# Supplementary material for: Mutational scanning pinpoints distinct binding sites of key ATGL regulators in lipolysis
Source: PubMed Central journal article supplement (PMC10958042; doi:10.1038/s41467-024-46937-x), 2024-03-21

## **Supplemental Information**

### **Mutational scanning pinpoints distinct binding sites of key ATGL regulators in lipolysis**

Johanna M. Kohlmayr, Gernot F. Grabner, Anna Nusser, Anna Höll, Verina Manojlović, Bettina Halwachs, Sarah Masser, Evelyne Jany-Luig, Hanna Engelke, Robert Zimmermann, Ulrich Stelzl

**Suppl. Figure 1:** Expression of ATGL constructs in HEK293T cells for Co-IP analysis.

**Suppl. Figure 2:** Protein expression and phenotype of T-REx<sup>TM</sup>-293 cells stably expressing PLIN1 or PLIN5.

**Suppl. Figure 3:**

Single cell confocal images of stained, live T-REx<sup>TM</sup>-293 cells stably expressing doxycycline induced PLIN1.

**Suppl. Figure 4:**

Single cell confocal images of stained, live T-REx<sup>TM</sup>-293 cells stably expressing doxycycline induced PLIN5.

**Suppl. Figure 5:**

Confocal images of stained, live T-REx<sup>TM</sup>-293 cells stably expressing doxycycline induced PLIN1.

**Suppl. Figure 6:**

Confocal images of stained, live T-REx<sup>TM</sup>-293 cells stably expressing doxycycline induced PLIN5.

## Suppl. Figure 1

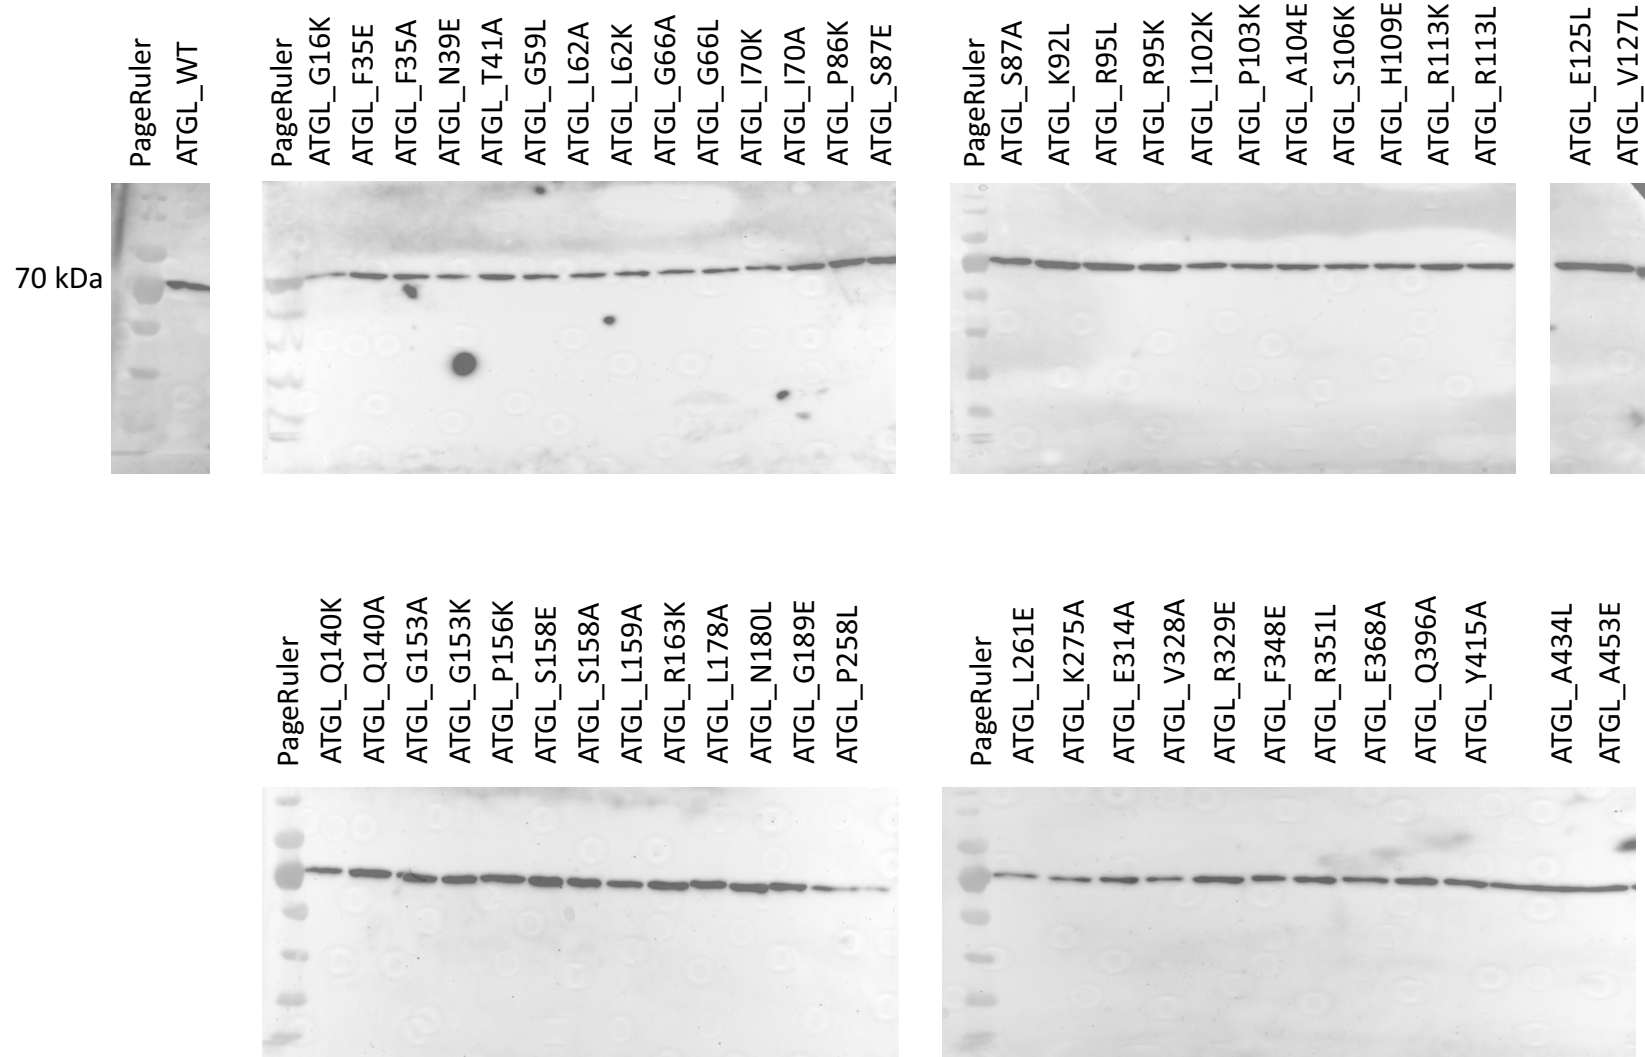

### Kohlmayr et al, **Suppl. Figure 1:**

Expression of ATGL constructs in HEK293T cells for Co-IP analysis. Cells were lysed in SDS-free RIPA2 buffer, and cleared samples were loaded on a 10% SDS-gel and blotted on a nitrocellulose membrane. Immunodetection was performed using an Ab against Protein A (1:3000, anti-rabbit-IgG-HRP linked, NA934, GE Healthcare/Amersham).

## Suppl. Figure 2

**A**

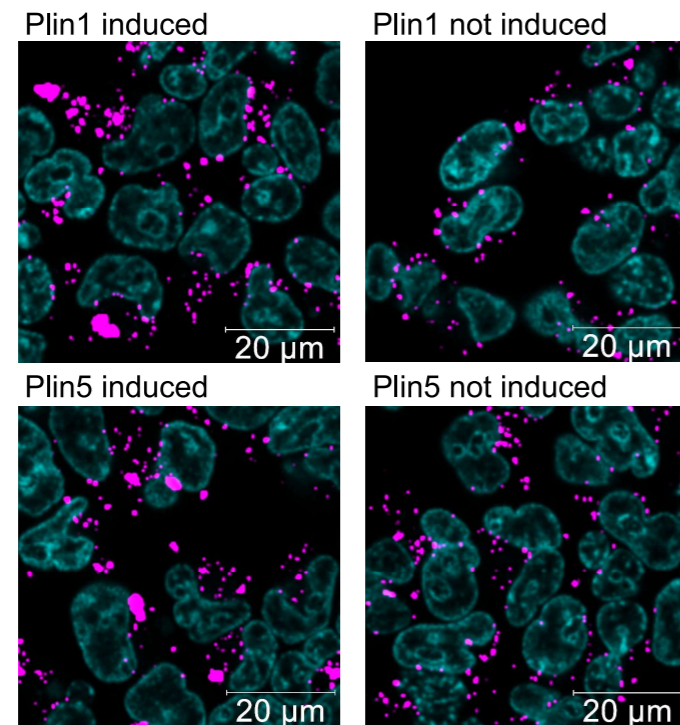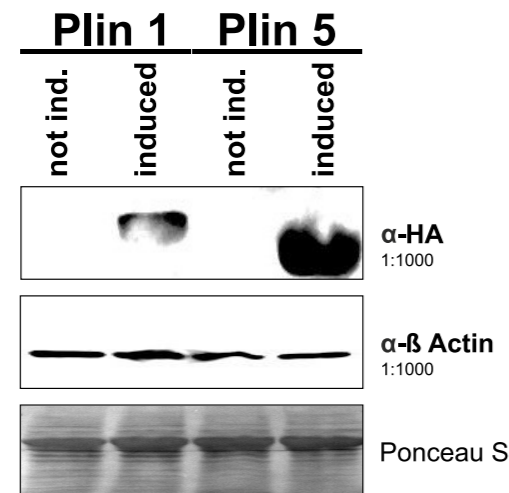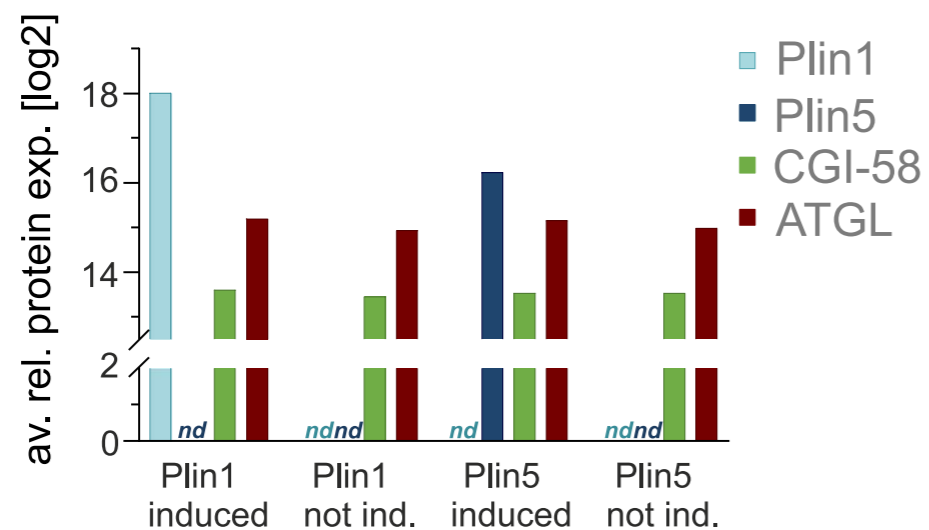

Kohlmayr et al, **Suppl. Figure 2:**

Protein expression and phenotype of T-REx™-293 cells stably expressing PLIN1 or PLIN5.

**Top:** Confocal images of T-REx™-293 cells stably expressing PLIN1 or PLIN5 (induced) or not induced. Plin1/5 expression was induced with doxycycline (2 $\mu$ g/ml) for 24 hours and then treated with 200 $\mu$ M oleic acid for 6h. Pictures are merged fluorescent images of live cells stained with Hoechst in cyan and Bodipy 558/568 C12 in magenta.

**Middle:** Western blot of whole cell extracts of T-REx™-293 cells expressing PLIN1 or PLIN5 (induced) or not induced. Cells were treated as in A. Top: PVDF membrane developed with anti-HA.11 Epitope Tag antibody (1:10000, 901501, Biolegend); Middle PVDF membrane developed with anti- $\beta$  Actin (clone AC-15) antibody (1:5000, A5441, Sigma); Bottom: Ponceau stained PVDF membrane.

**Bottom:** Mass spectrometry based relative protein quantification of PLIN1, PLIN5, CGI-58 and ATGL from total cell extract of T-REx™-293 cells stably expressing doxycycline inducible PLIN1 or PLIN5 (induced and not induced).

### Suppl. Figure 3

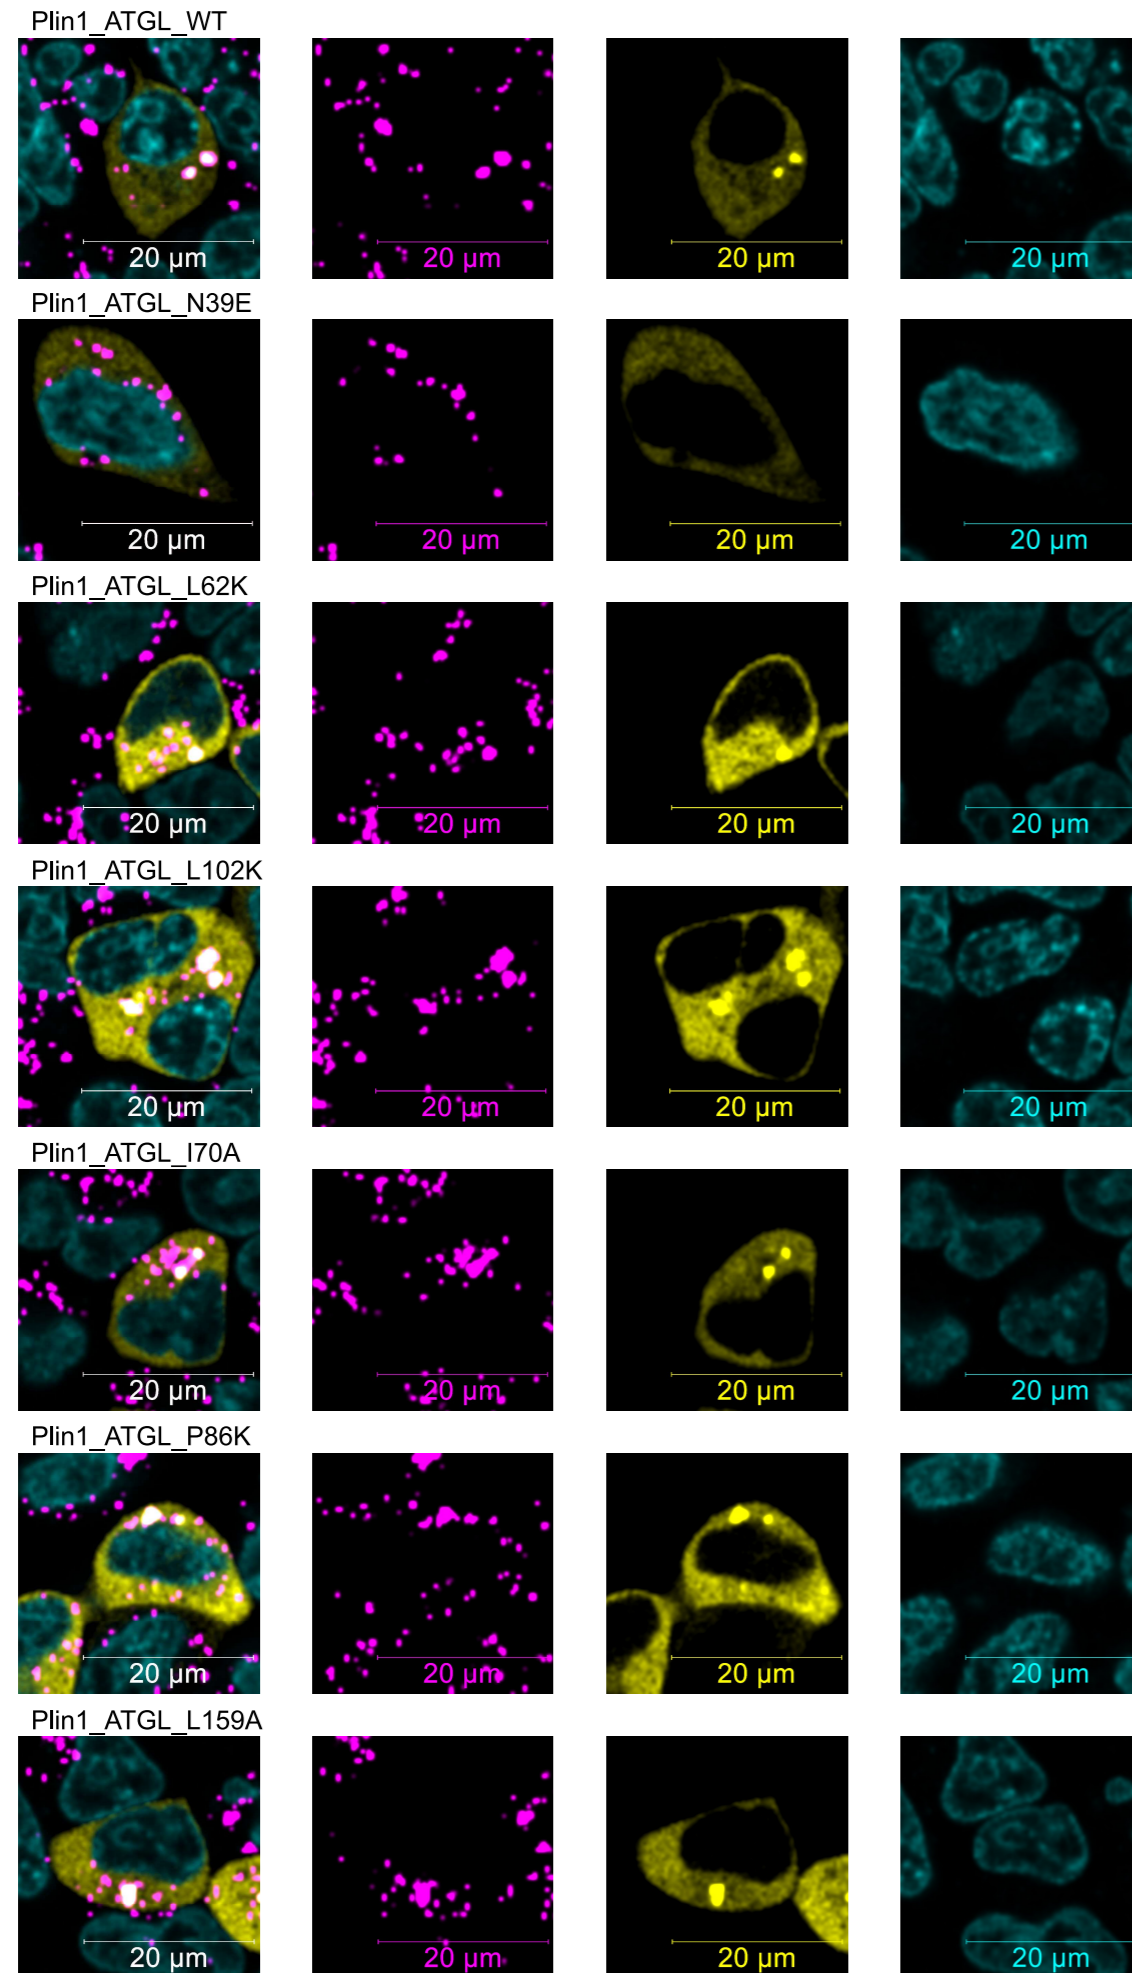

### Kohlmayr et al, Suppl. Figure 3:

Single cell confocal images of stained, live T-REx™-293 cells stably expressing doxycycline induced PLIN1.

Cells were transiently transfected with YFP-ATGL variants and PLIN1/5 expression simultaneously induced with doxycycline (2μg/ml). After 24 hours cells were treated with 200μM oleic acid for 6h. Pictures are merged fluorescent images with Hoechst in cyan, YFP-ATGL in yellow and Bodipy 558/568 C12 (D3835, FisherScientific) in magenta, next to the three separated channels. The experiments were repeated three times with similar outcome.

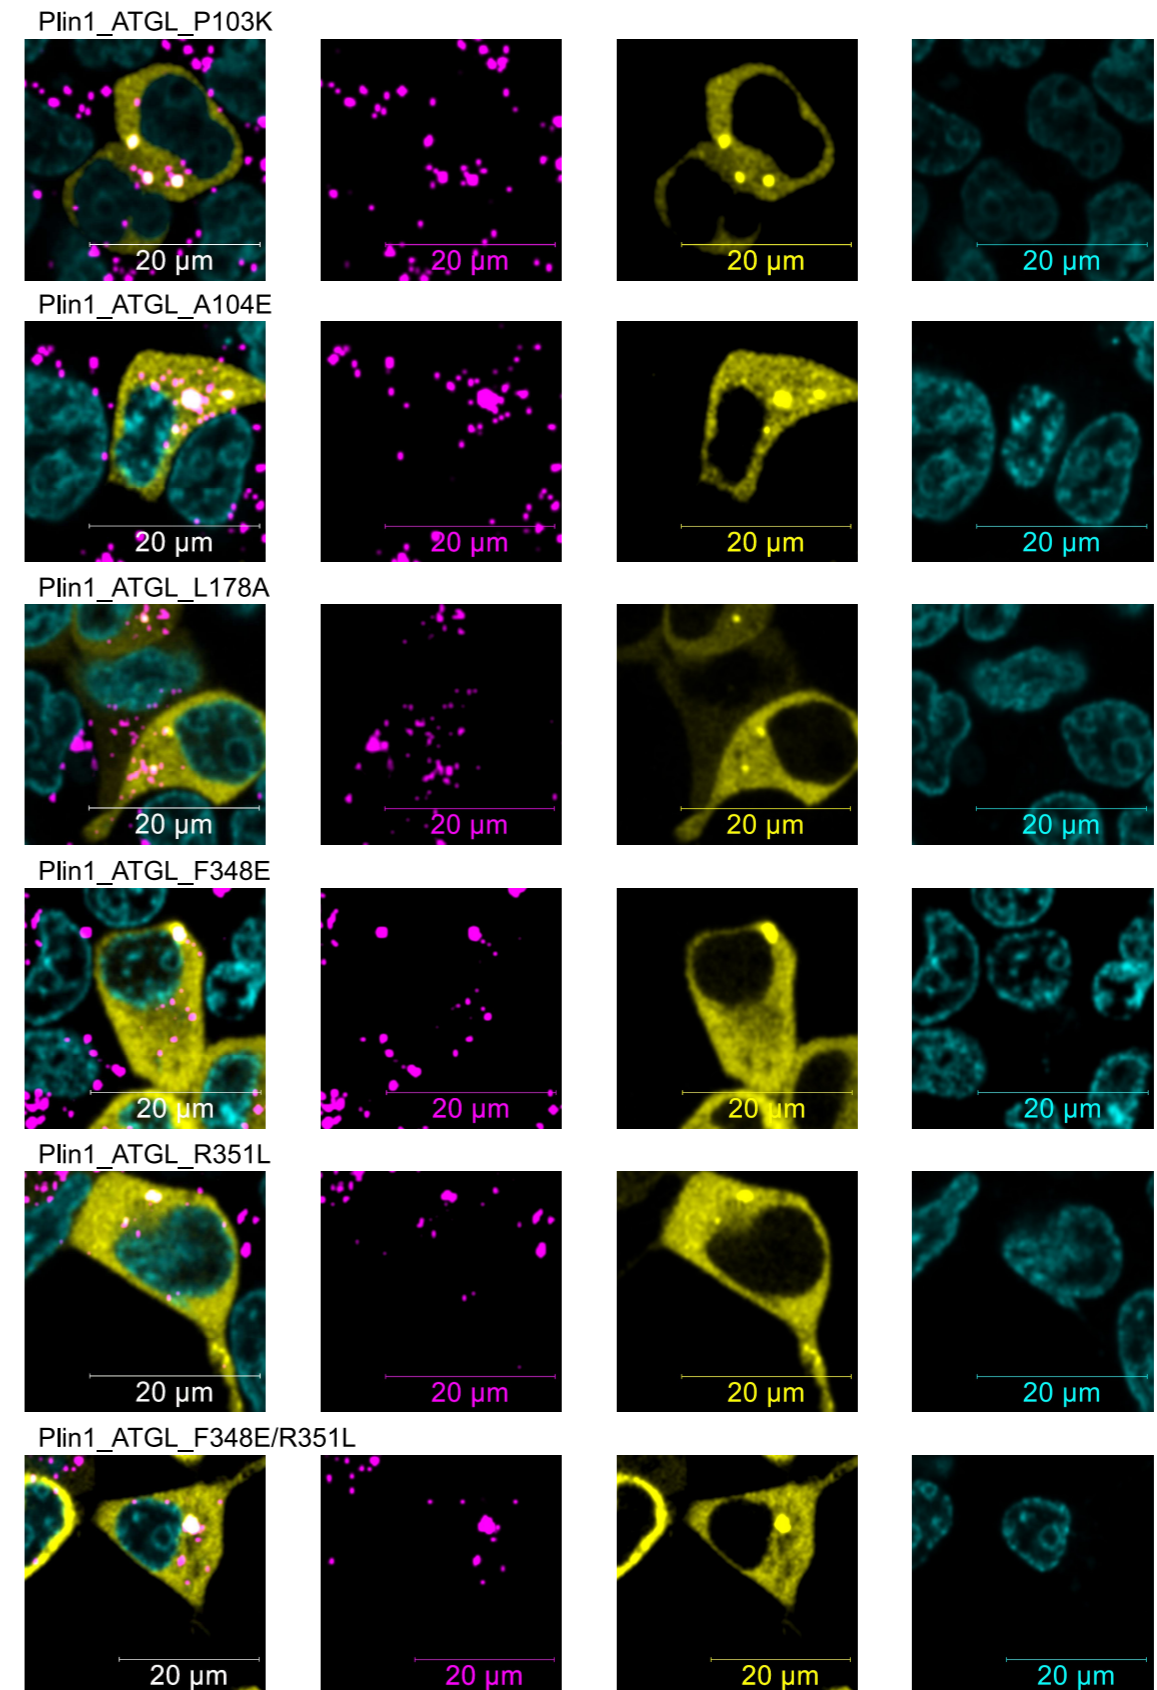

## Suppl. Figure 4

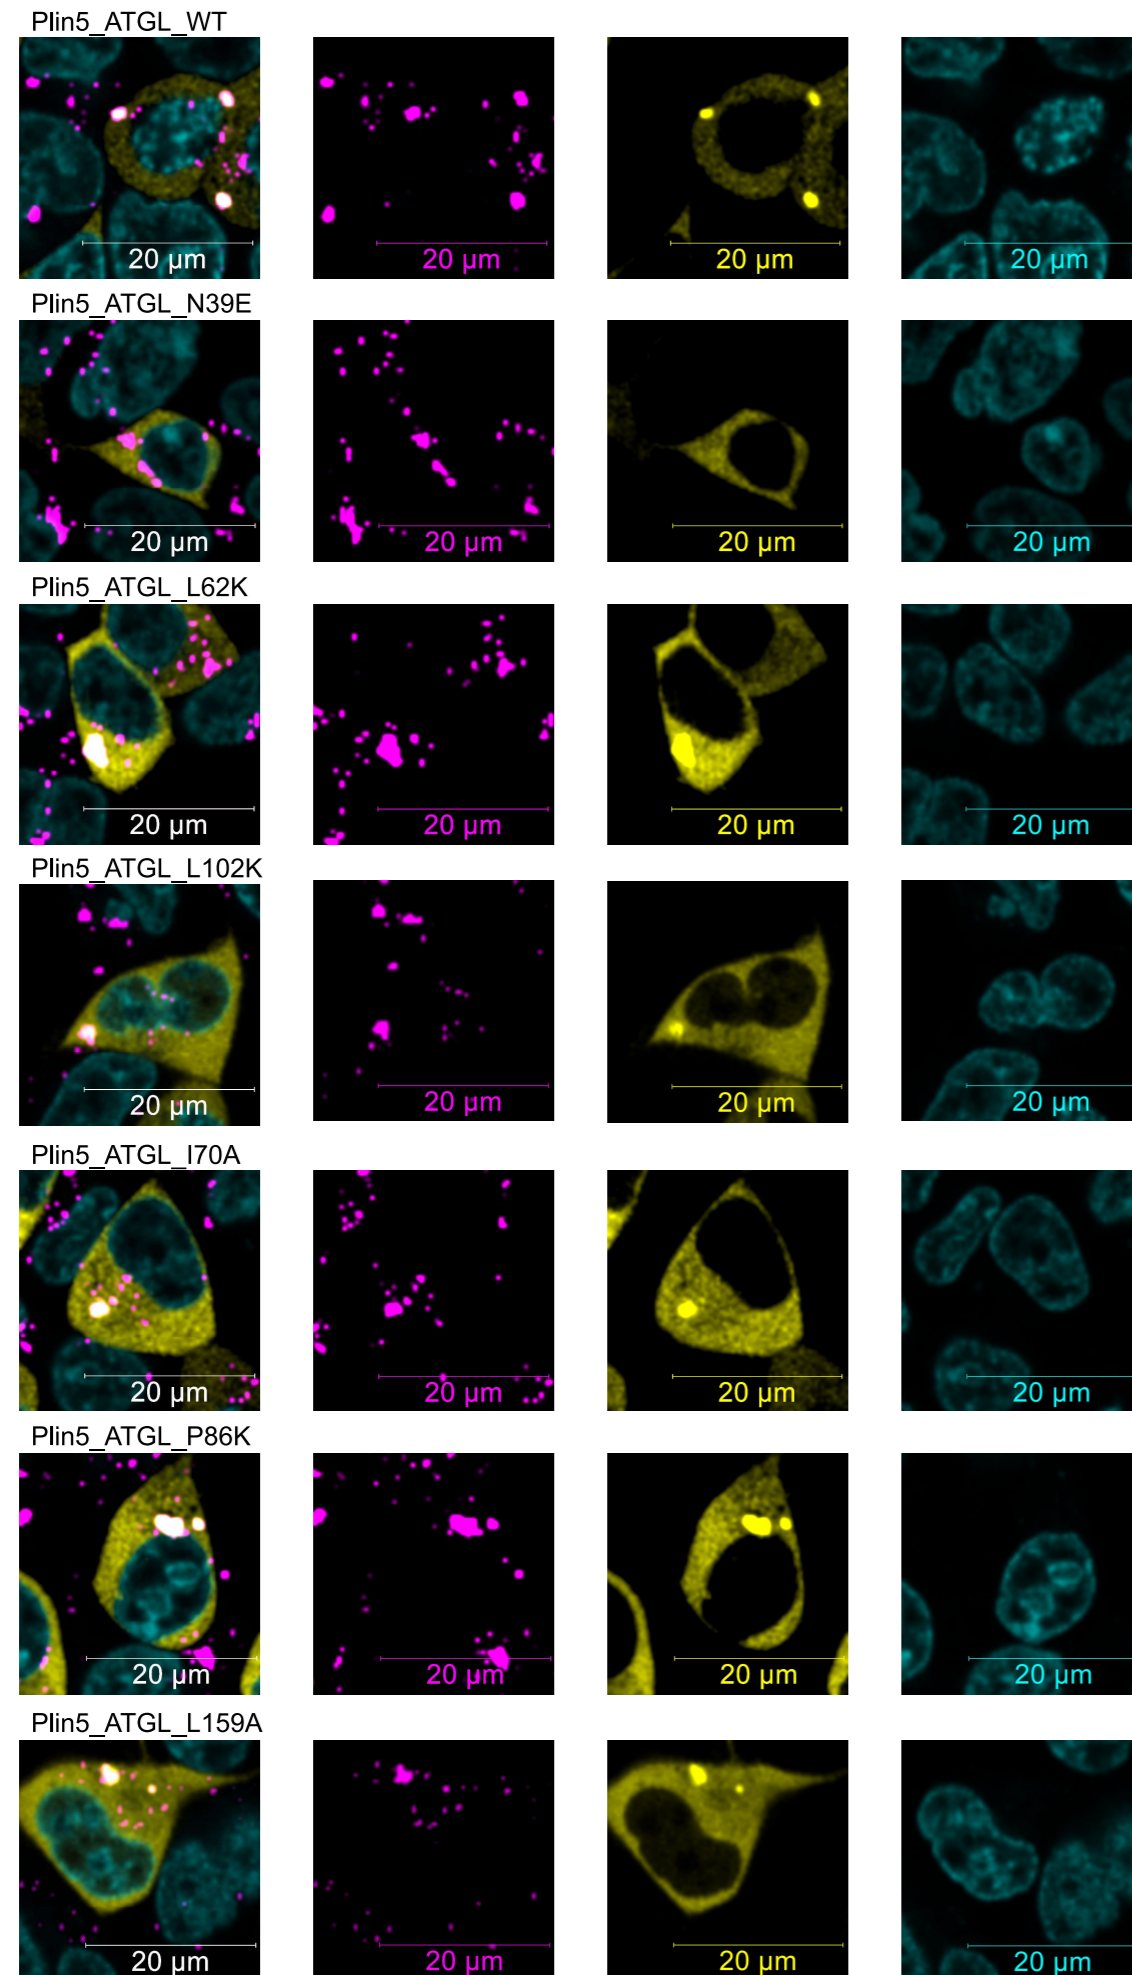

## Kohlmayr et al, Suppl. Figure 4:

Single cell confocal images of stained, live T-REx™-293 cells stably expressing doxycycline induced PLIN5.

Cells were transiently transfected with YFP-ATGL variants and PLIN1/5 expression simultaneously induced with doxycycline (2 μg/ml). After 24 hours cells were treated with 200 μM oleic acid for 6h. Pictures are merged fluorescent images with Hoechst in cyan, YFP-ATGL in yellow and Bodipy 558/568 C12 (D3835, FisherScientific) in magenta, next to the three separated channels. The experiments were repeated three times with similar outcome.

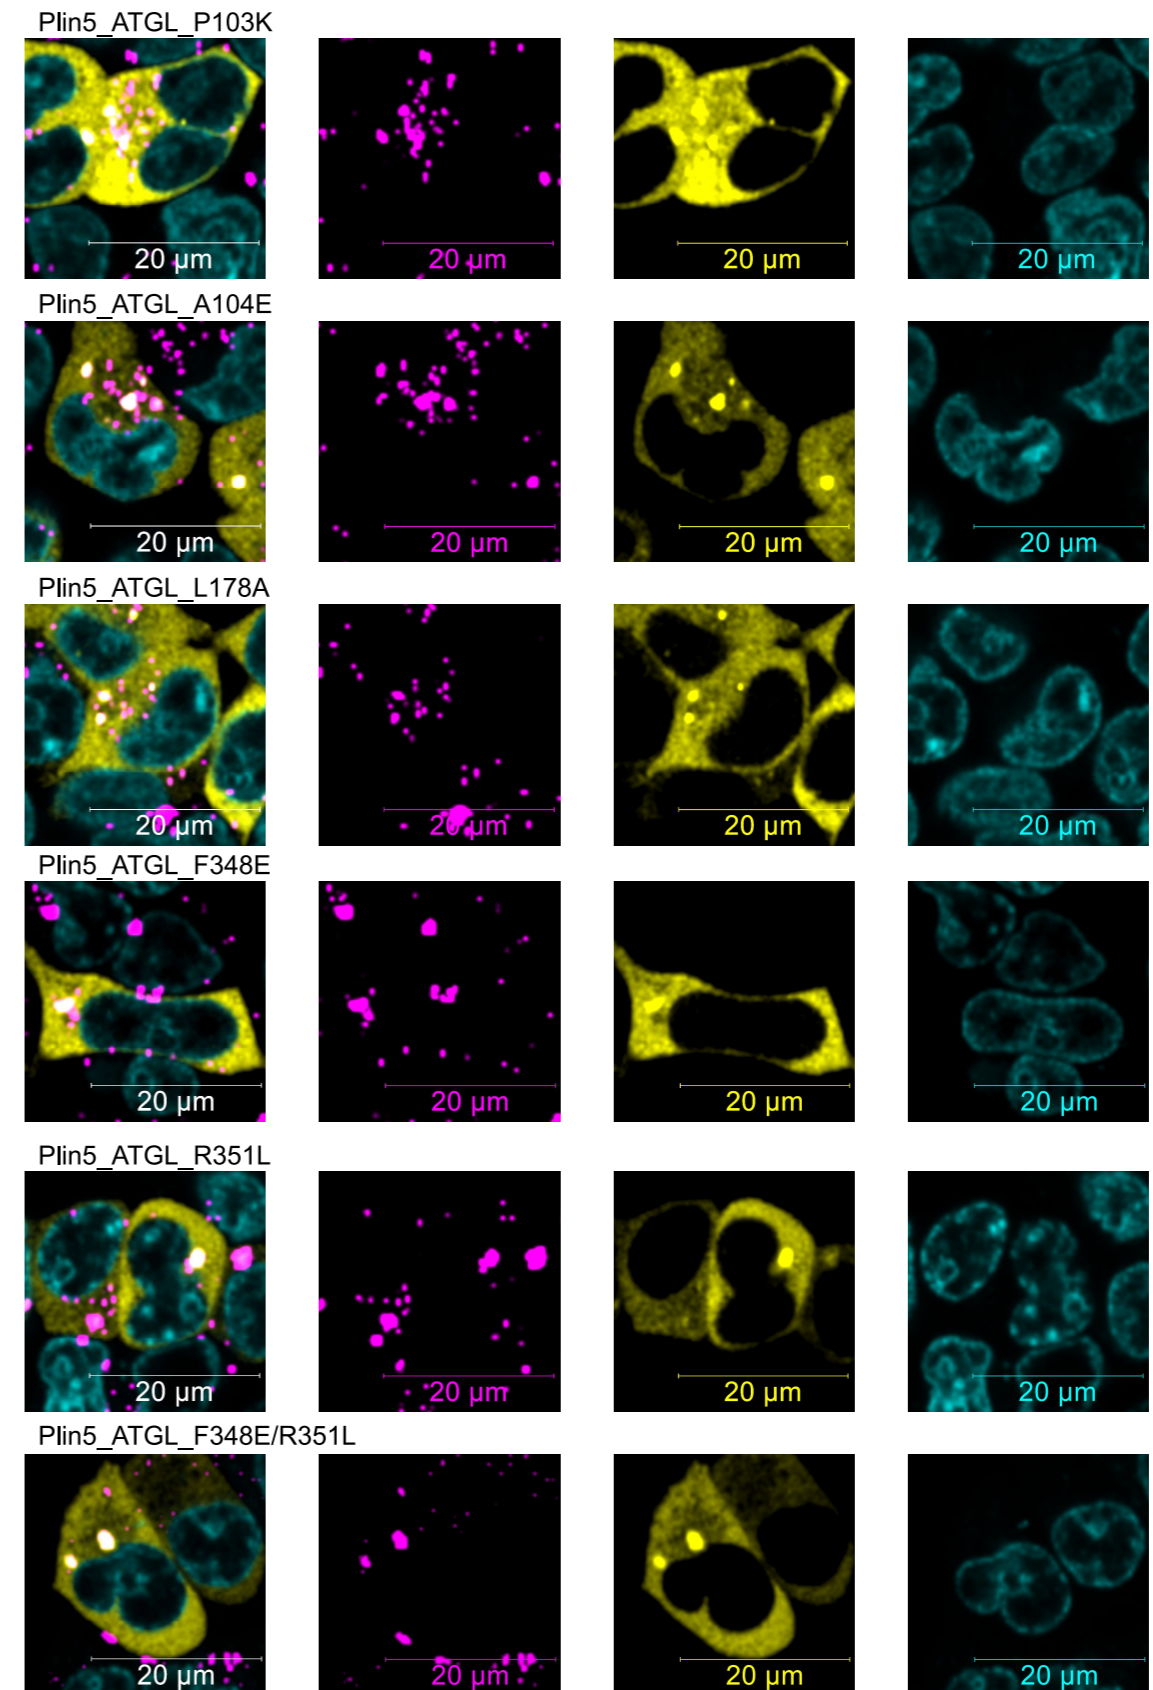

## Suppl. Figure 5

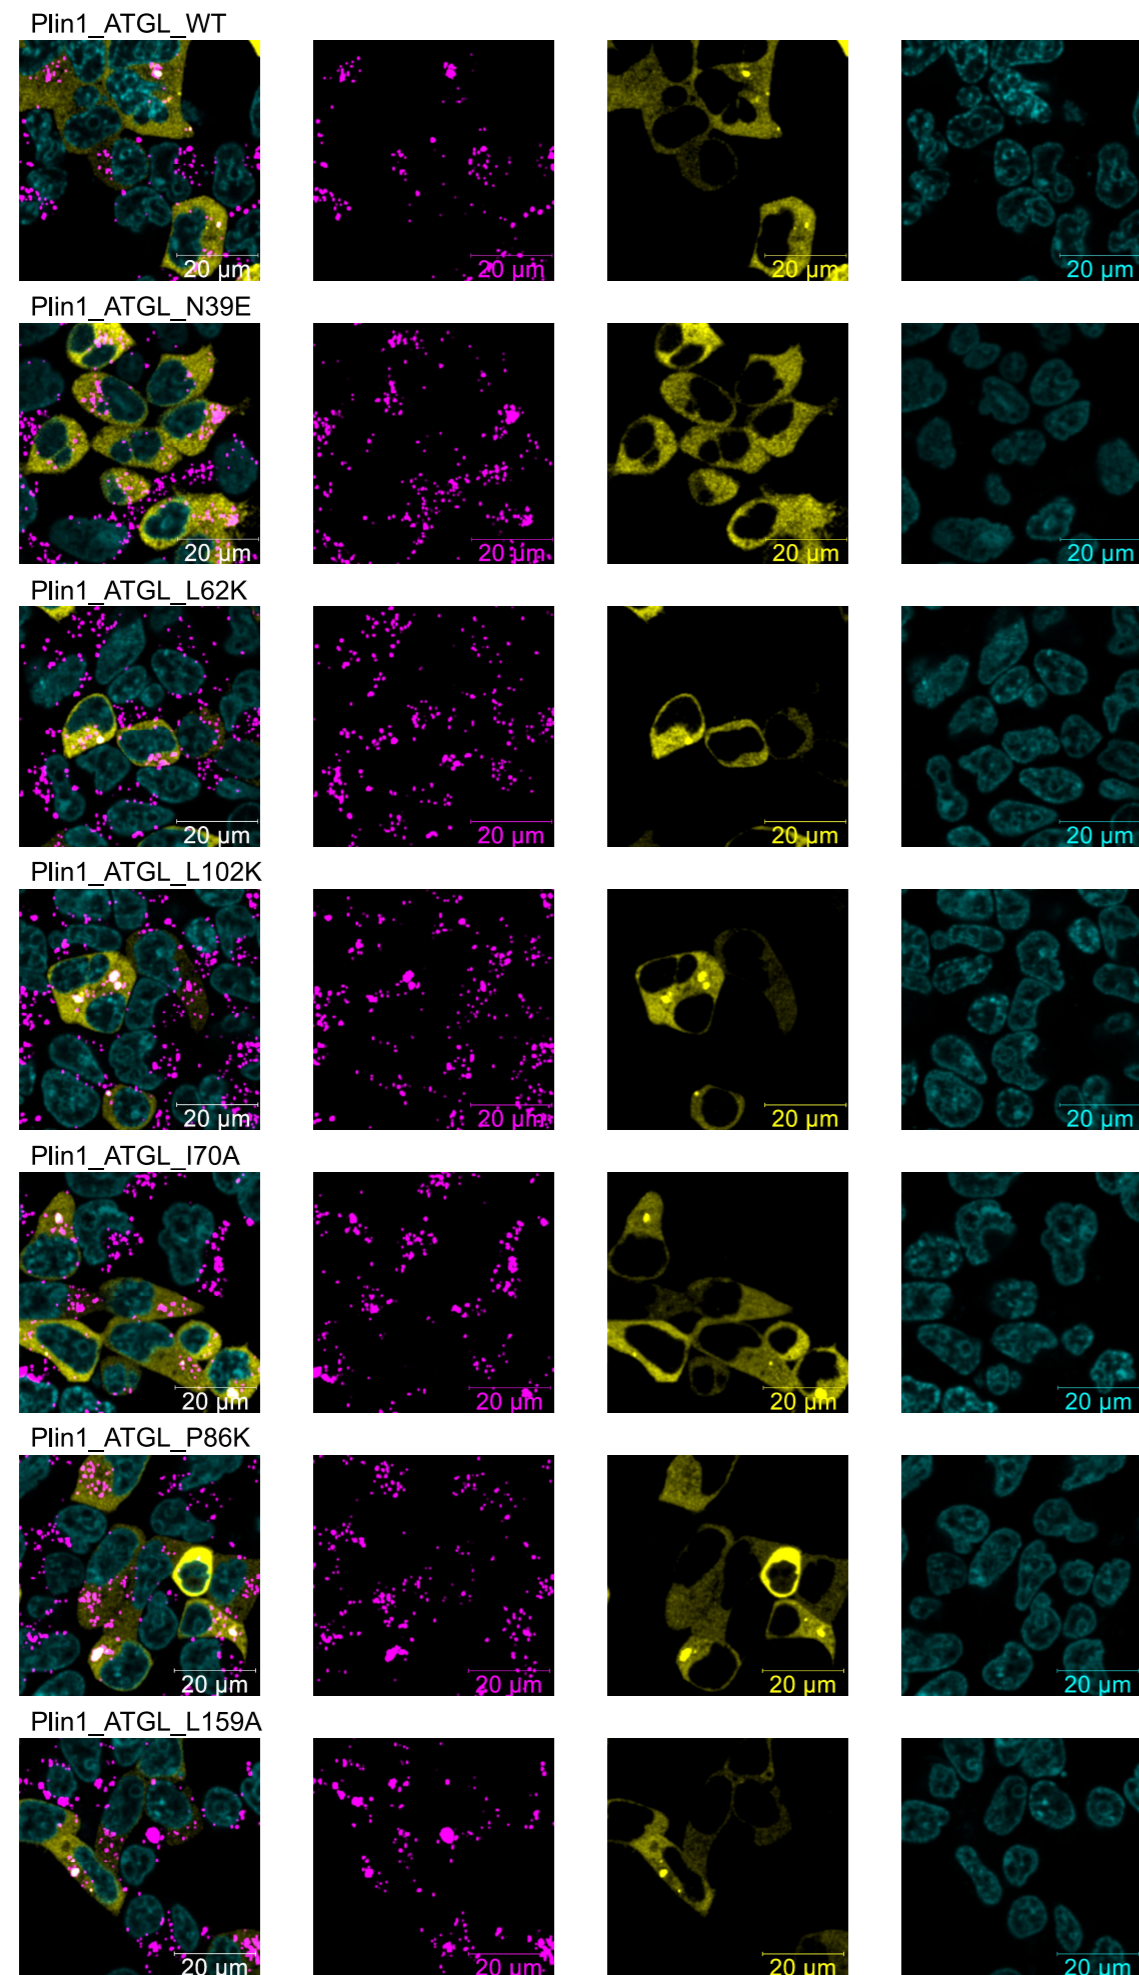

## Kohlmayr et al, Suppl. Figure 5:

Confocal images of stained, live T-REx™-293 cells stably expressing doxycycline induced PLIN1.

Cells were transiently transfected with YFP-ATGL variants and PLIN1/5 expression simultaneously induced with doxycycline (2μg/ml). After 24 hours cells were treated with 200μM oleic acid for 6h. Pictures are merged fluorescent images with Hoechst in cyan, YFP-ATGL in yellow and Bodipy 558/568 C12 (D3835, FisherScientific) in magenta, next to the three separated channels. The experiments were repeated three times with similar outcome.

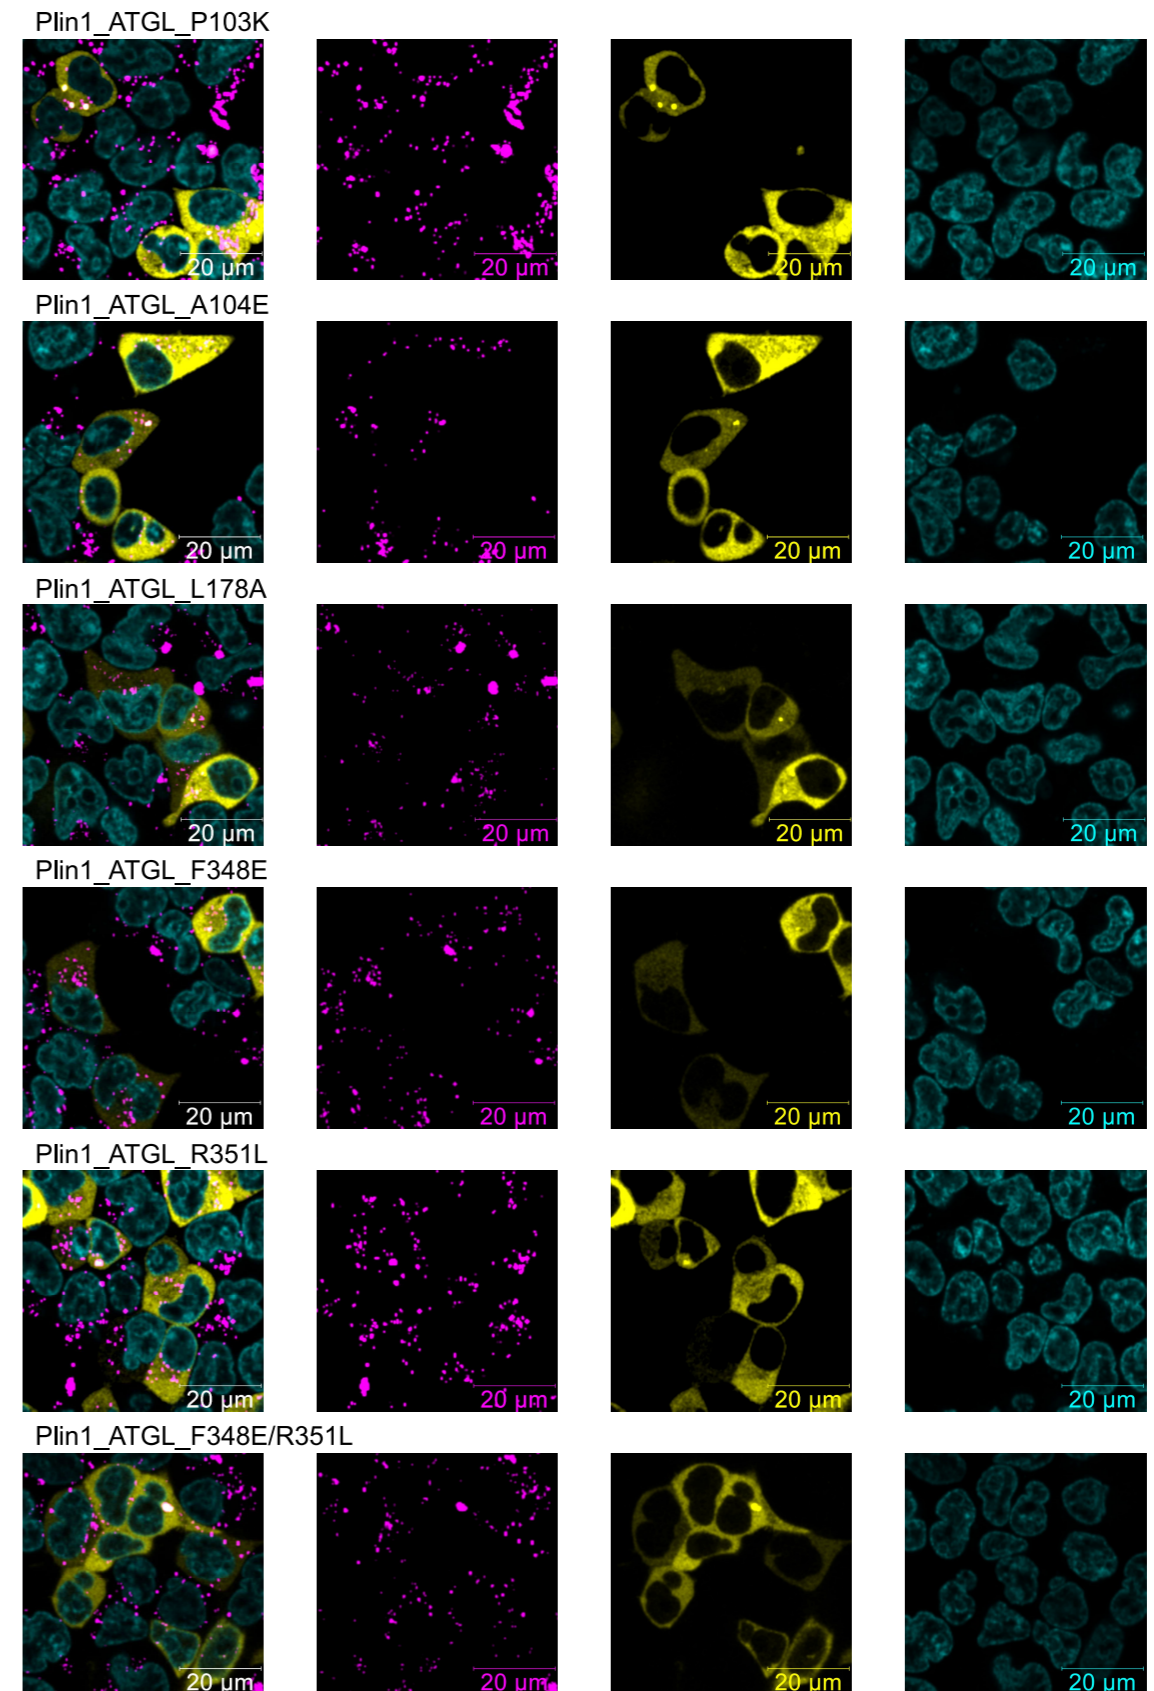

## Suppl. Figure 6

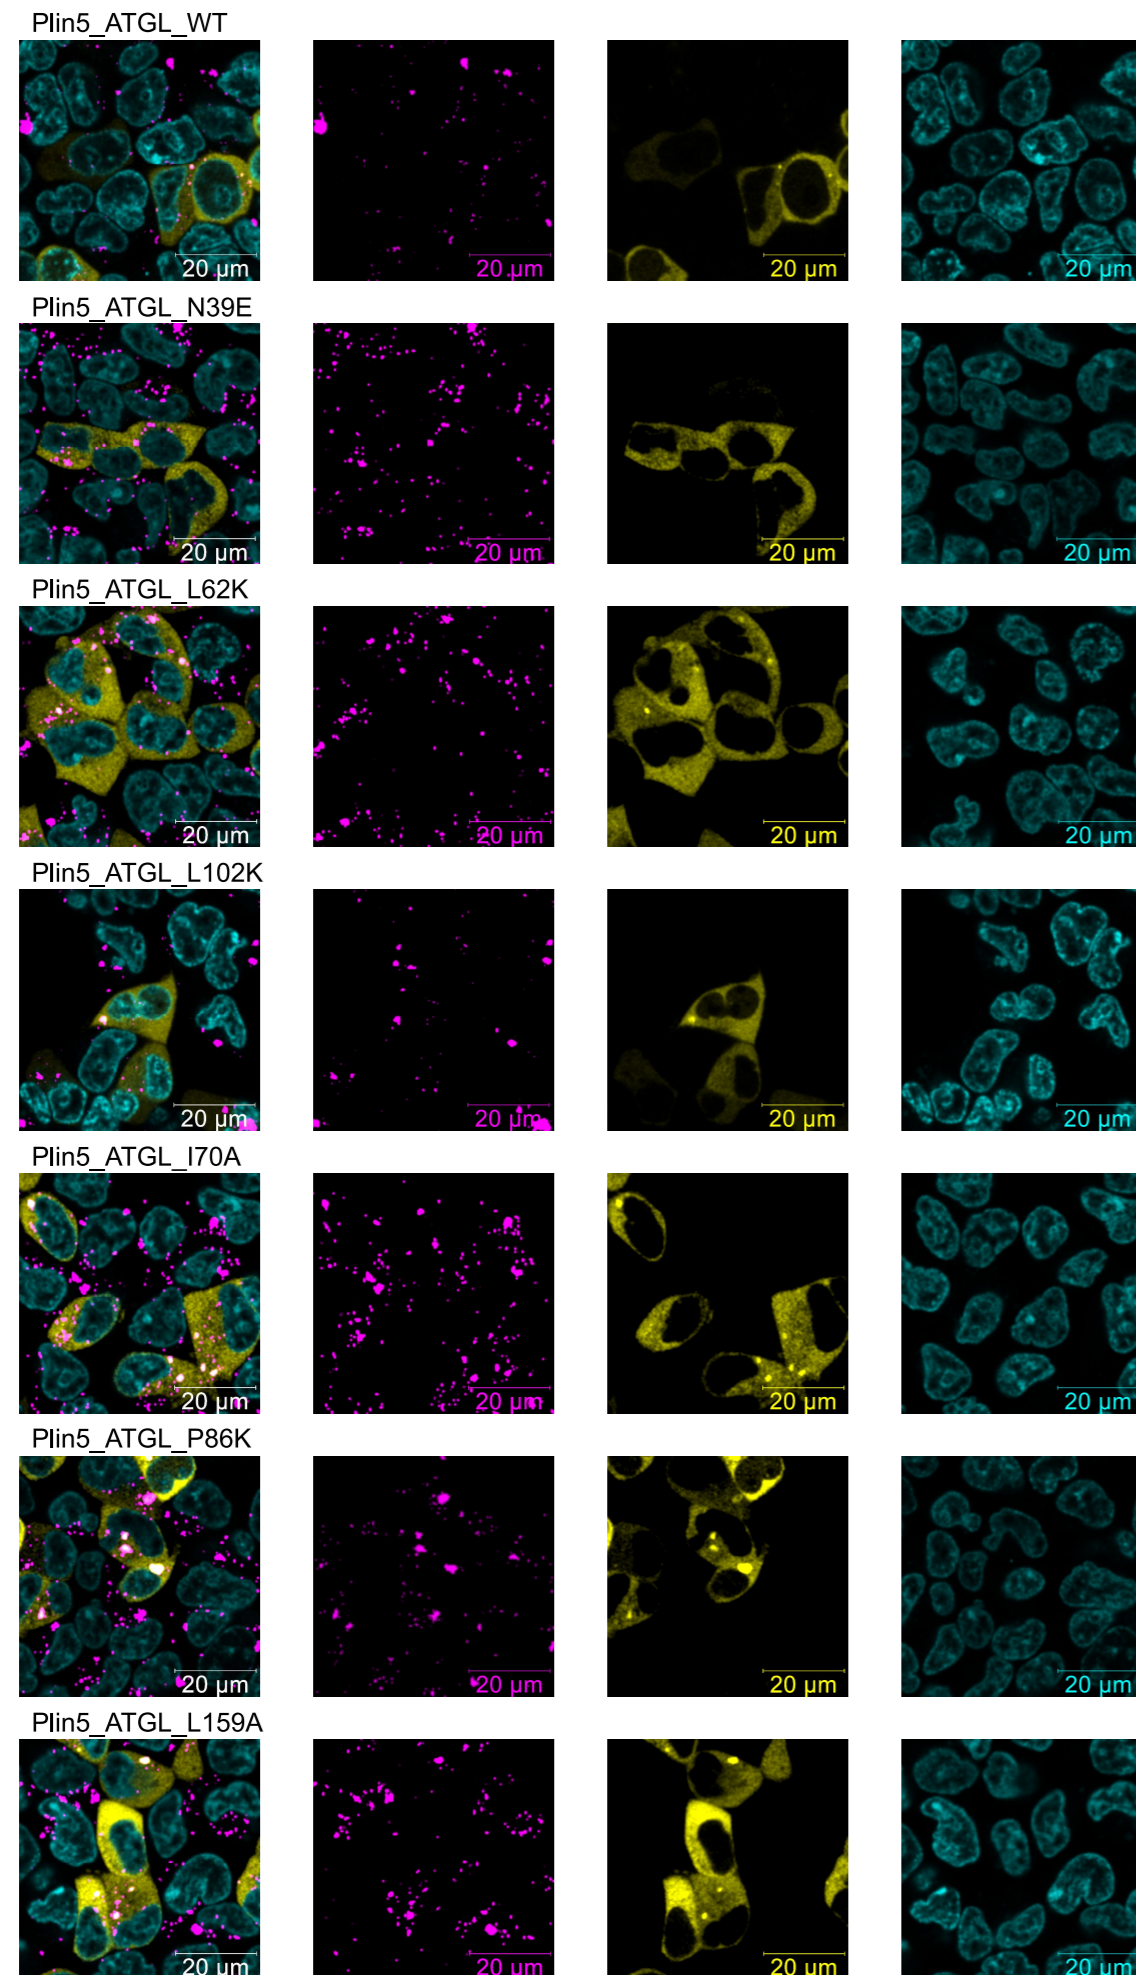

## Kohlmayr et al, Suppl. Figure 6:

Confocal images of stained, live T-REx™-293 cells stably expressing doxycycline induced PLIN5.

Cells were transiently transfected with YFP-ATGL variants and PLIN1/5 expression simultaneously induced with doxycycline (2μg/ml). After 24 hours cells were treated with 200μM oleic acid for 6h. Pictures are merged fluorescent images with Hoechst in cyan, YFP-ATGL in yellow and Bodipy 558/568 C12 (D3835, FisherScientific) in magenta, next to the three separated channels. The experiments were repeated three times with similar outcome.

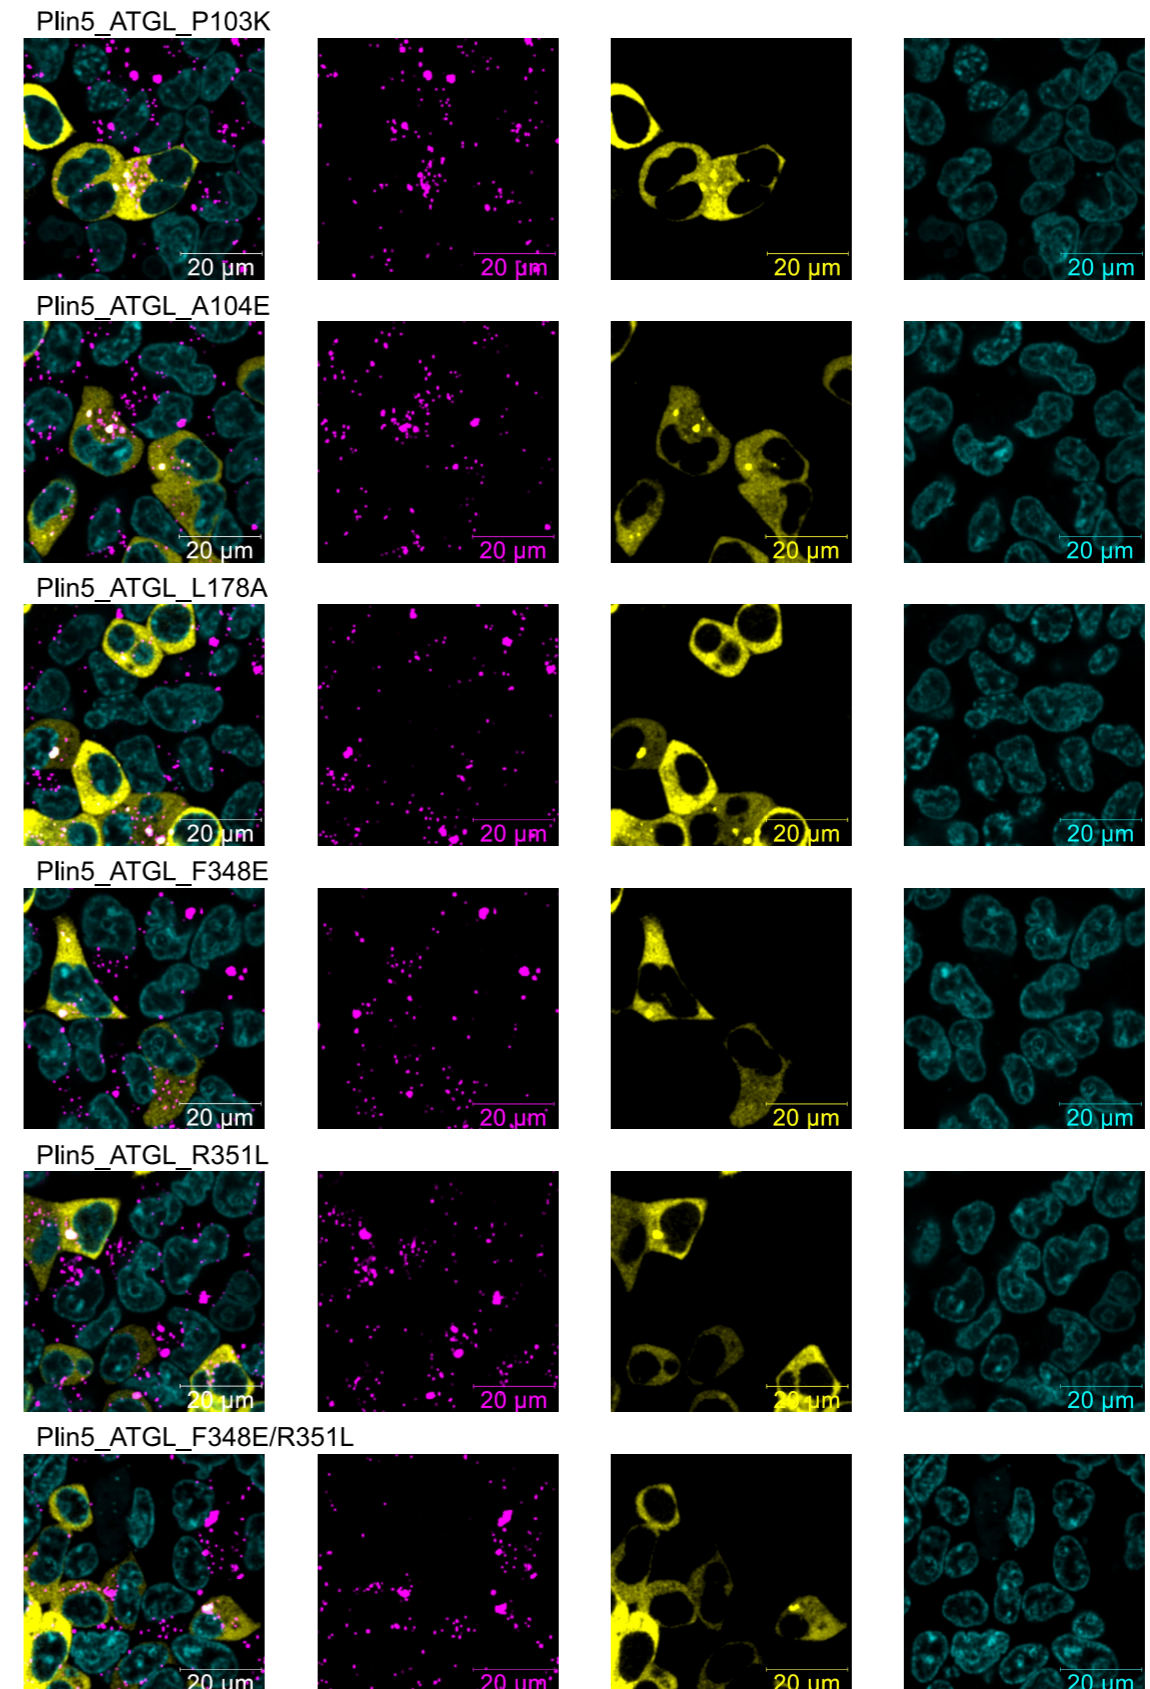

Supplement: 41467_2024_46937_MOESM1_ESM.pdf [file 41467_2024_46937_MOESM1_ESM.pdf]
